# Supplementary material for: The circadian rhythms regulated by Cx43-signaling in the pathogenesis of Neuromyelitis Optica
Source: Frontiers journal article supplement (doi:10.3389/fimmu.2022.1021703), 2023-01-16

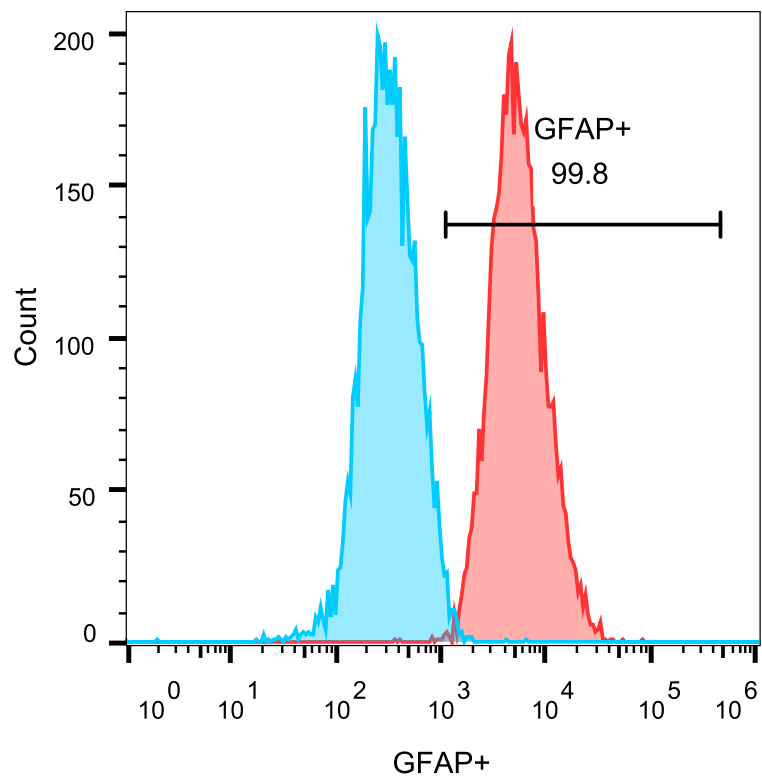

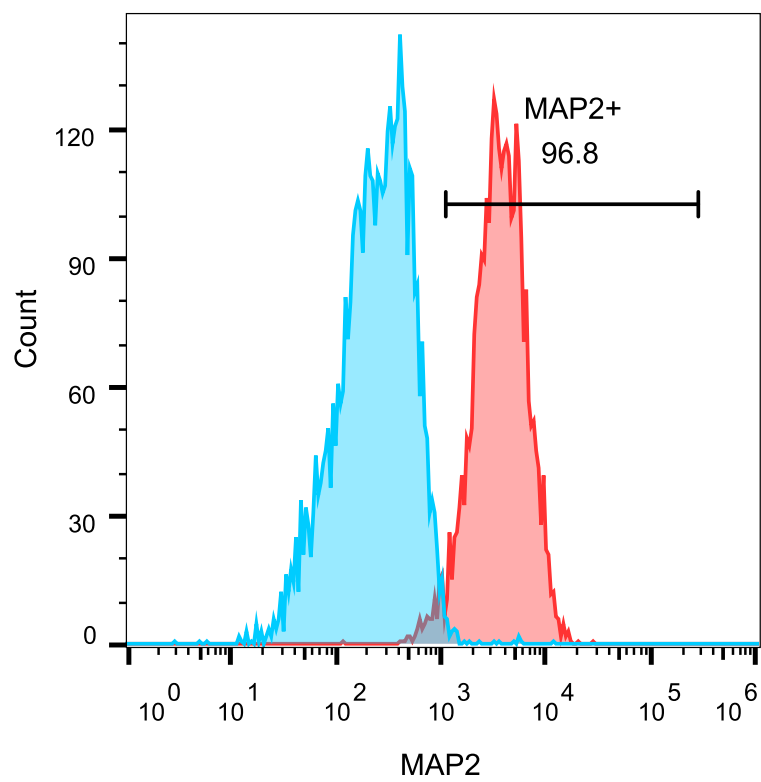

Supplement: Data_Sheet_1.ZIP [file Data_Sheet_1.ZIP]
